# Supplementary material for: Glycoproteomics in Cerebrospinal Fluid Reveals Brain-Specific Glycosylation Changes
Source: MDPI journal article supplement (doi:10.3390/ijms24031937), 2023-01-18
Supplement: s1 [file s1]

# Supplementary information

## Glycoproteomics in cerebrospinal fluid reveals brain-specific glycosylation changes

Melissa Baerenfaenger<sup>1, 2</sup>; Merel A Post<sup>1</sup>; Pieter Langenhorst<sup>3</sup>; Karin Huijben<sup>3</sup>; Fokje Zijlstra<sup>3</sup>; Joannes FM Jacobs<sup>3</sup>; Marcel M Verbeek<sup>1, 3</sup>; Hans JCT Wessels<sup>3</sup>; Dirk J Lefeber<sup>1, 3, \*</sup>

<sup>1</sup> Department of Neurology, Donders Institute for Brain, Cognition, and Behavior, Radboud University Medical Center, Nijmegen, Netherlands

<sup>2</sup> Division of BioAnalytical Chemistry, AIMMS Amsterdam Institute of Molecular and Life Sciences, Vrije Universiteit Amsterdam, Amsterdam, Netherlands

<sup>3</sup> Translational Metabolic Laboratory, Department of Laboratory Medicine, Radboud University Medical Center, Nijmegen, Netherlands

\* Correspondence: Drik.Lefeber@radboudumc.nl

This document contains supplementary Table S3.

**Table S3.** Patient information

| CDG /Diagnose | Sex | Birth      | Transferrin isoelectric focussing results                                                                                                                                                | Clinical symptoms                                                                                                                                                                                                                                                                                                                       | Date of sampling |
|---------------|-----|------------|------------------------------------------------------------------------------------------------------------------------------------------------------------------------------------------|-----------------------------------------------------------------------------------------------------------------------------------------------------------------------------------------------------------------------------------------------------------------------------------------------------------------------------------------|------------------|
| Alcohol abuse | M   | 24.06.1951 | No information                                                                                                                                                                           | No clinical symptoms described except for high fever.                                                                                                                                                                                                                                                                                   | 18.07.1997       |
| ALG1          | M   | 03.12.1996 | No information                                                                                                                                                                           | No information                                                                                                                                                                                                                                                                                                                          | No info          |
| ALG6          | M   | 26.09.1995 | Strongly deviating pattern with increase in asialo and disialo TF (19.08.2009)                                                                                                           | Mental disorder, motoric retardation, seizures, epilepsy, abnormal physical appearance, lethargy, hypotony, feeding problems, recurrent infections.                                                                                                                                                                                     | 15.12.1997       |
| ATP6VoA2      | F   | 25.09.1995 | No information                                                                                                                                                                           | Mental retardation, motoric retardation, abnormal fat distribution, facial myoclonus, <i>Curtis laxa</i> .                                                                                                                                                                                                                              | 23.06.1998       |
| DPM1          | V   | 01.04.1998 | No information                                                                                                                                                                           | Serious neurological problems.                                                                                                                                                                                                                                                                                                          | 25.08.1999       |
| DPM3          | F   | 06.08.1981 | deviating pattern with increase in disialo TF (19.03.2018)                                                                                                                               | Mental retardation, developmental delay, myopathy, cardiomyopathy, stroke-like episodes.                                                                                                                                                                                                                                                | 01.10.2001       |
| MPI           | F   | 05.12.1999 | Deviating pattern with increase in disialo TF before treatment (01.03.2005).<br>Dietary intervention with mannose was started in 2005. Subsequently, TF pattern normalized (10.01.2012). | Behavioural abnormalities, epilepsy/ epileptiform activity in EEG, dementia, thrombosis.                                                                                                                                                                                                                                                | 02.07.2008       |
| NANS          | M   | 21.12.2012 | Normal TF pattern                                                                                                                                                                        | Increased ManNAc levels in plasma, Skeletal dysplasia, delayed motor skills, Generalized hypotonia, Ventriculomegaly; Abnormality in periventricular white matter; Cerebral atrophy; Persistent vacuum vergae; Abnormal basal nuclei; Hypoplasia of the corpus callosum and splenium, <i>aplasia rostrum</i> ; Asymmetry of cerebellum. | 2014             |
| no diagnose I | F   | 29.09.1995 | No information                                                                                                                                                                           | Suspected CDG                                                                                                                                                                                                                                                                                                                           | 30.01.1998       |

|                      |   |            |                                                                           |                                                                                                                                                                                 |            |
|----------------------|---|------------|---------------------------------------------------------------------------|---------------------------------------------------------------------------------------------------------------------------------------------------------------------------------|------------|
| no<br>diagnose<br>II | M | 14.02.1995 | Normal TF pattern<br>(05.03.2009)                                         | Unknown diagnosis, mental disorder, spastic-ataxic syndrome, ataxia, white matter abnormalities, cerebellar hypoplasia. Patient has a brother with the same clinical phenotype. | 23.10.1997 |
| PMM2_a               | M | 13.11.1997 | No information                                                            | No information                                                                                                                                                                  | 16.04.1998 |
| PMM2_b               | M | 24.02.1995 | Slightly deviating TF pattern with increase in disialo TF<br>(15.02.2006) | Motoric retardation, cerebellar hypoplasia, developmental delay, hypotony, microcephaly.                                                                                        | 28.01.1998 |
| SLC35A1              | F | 27.10.1977 | Deviating TF pattern<br>(06.03.1997)                                      | Epilepsy, Consanguinity, imbecility, unexplained psychomotor disability. Patient died 15.12.1998.                                                                               | 23.01.1998 |
| SRD5A3               | M | 16.10.1991 | deviating pattern<br>(06.03.1997)                                         | Cerebral ataxia, coordination problems, developmental delay, muscular hypotonia.                                                                                                | 17.02.1998 |
